# Supplementary material
Source: Research Square preprint supplement (doi:10.21203/rs.3.rs-9118811/v1)
Supplement: Supplementary file 1 [file adee291d6219bf52b24d0902.docx]

**Appendices: Human and ChatGPT 4.0’s translation Results**

**SL:** Burung hantu membuka sekolah untuk binatang di hutan Mereka akan belajar membaca Burung hantu memang guru yang baik Ia mengajar para binatang dengan sabar Hanya Si Putih Kelinci yang tidak ikut Ia lebih senang bermain saja di hutan. Suatu hari Si Putih tersesat Ia tidak dapat membaca petunjuk arah pulang Si Putih sedih karena tidak belajar membaca.

**CHATGPT 4**

**The Lazy Rabbit**

The owl opened a school for the animals in the forest. They would learn how to read. The owl was indeed a good teacher. He taught the animals patiently. Only Whitey the Rabbit did not join; he preferred to play in the forest instead. One day, Whitey got lost. He couldn’t read the signs showing the way home. Whitey felt sad because he had never learned to read.

**MANUSIA**

**The Lazy Rabbit**

The owl opened a school for the animals in the forest. The animals were learning to read. The owl was a good teacher. He taught them patiently. But the white rabbit did not come to school. The rabbit wanted to play in the forest. One day, the rabbit got lost. The rabbit could not read the signs to get home. The rabbit was sorry because he did not learn to read.

**SL: Mbah Batu**

Batu berasal dari nama seorang ulama pengikut Pangeran Diponegoro yang bernama Abu Ghonaim yang selanjutnya masyarakat setempat akrab menyebutnya dengan panggilan Mbah Wastu or Mbatu atau Batu. Sedikit menengok ke belakang tentang sejarah keberadaan Abu Ghonaimsebagai cikal bakal serta orang yang dikenal sebagai pemuka masyarakat yangmemulai babat alas dan dipakai sebagai inspirasi dari sebutan wilayah Batu, sebenarnya Abu Ghonaim sendiri adalah berasal dari Jawa Tengah. Abu Ghonaim sebagai pengikut Pangeran Diponegoro yang setia, dengan sengaja meninggalkan daerah asalnya Jawa Tengah dan hijrah dikaki Gunung Panderman untuk menghindari pengejaran dan penangkapan dari serdadu Belanda (Kompeni). Abu Ghonaim atau Mbah Wastu yang memulai kehidupan barunyabersama dengan masyarakat yang adasebelumnya serta ikut berbagi rasa, pengetahuan dan ajaran yang diperolehnya semasa menjadi pengikut Pangeran Diponegoro. Bermula mereka hidup dalam kelompok di daerah Bumiaji, Sisir danTemas akhirnya lambat laun komunitasnya semakin besar dan banyak serta menjadi suatu masyarakat yang ramai.

**ChatGPT: Mbah Batu (Batu)**

The name *Batu* comes from an Islamic scholar who was a follower of Prince Diponegoro, named Abu Ghonaim. Local people later became familiar with him and called him Mbah Wastu, Mbatu, or Batu. Looking back at the history of Abu Ghonaim—regarded as the origin figure and community leader who first cleared the forest and whose story inspired the naming of the Batu area—it is known that he originally came from Central Java. As a loyal follower of Prince Diponegoro, Abu Ghonaim deliberately left his homeland in Central Java and migrated to the foothills of Mount Panderman to escape pursuit and arrest by Dutch soldiers (the *Kompeni*). Abu Ghonaim, or Mbah Wastu, began his new life together with the earlier inhabitants of the region. He shared his experiences, knowledge, and teachings that he had gained while following Prince Diponegoro. What began as a small group living in the areas of Bumiaji, Sisir, and Temas gradually grew larger and more numerous, eventually forming a bustling community.

**human:**

# Mbah Batu (Batu)

Batu is a city in East Java. The name Batu came from Abu Ghonaim, a Muslim scholar who followed Prince Diponegoro. The local people called him Mbah Watu, or Mbatu, or Batu. He was the people’s leader. He started building the area, and his name became the name of the city, although he was originally from Central Java. Abu Ghonaim had to leave his hometown to escape from the Dutch Company’s army and moved to the foot of Mount Panderman. He lived with the people there and shared the teachings of Prince Diponegoro. The people lived as groups in Bumiaji, Sisir, and Temas, and then they slowly became a large community.

**SL: Gagak Sang Pembohong**

Suatu hari, empat ekor burung pipit sedang bertengger di sebuah pohon yang besar. Di atas mereka, terdapat seekor gagak. "Hai, aku tersesat. Bisakah aku tinggal bersama kalian? Aku akan menjadi teman kalian. "Seru si gagak. "Tentu saja!" Kata keempat burung pipit tersebut. Para burung pipit sangat baik dan mempercayai si burung gagak. Suatu hari, mereka berkata kepada si gagak, "Kami sedih, karena ular mengambil telur-telur kami." Lalu, si gagak berkata, "Masukkan telurmu ke sarangku dan aku akan menjaganya!" Setelah para burung pipit pergi, burung gagak-pun memakan semua telurnya. Saat semua burung pipit kembali ke rumah, mereka kaget karena semua telurnya pecah. "Siapa yang melakukannya?" pekik para burung pipit. "Hai burung pipit, aku tahu ular itu yang melakukannya. aku melihatnya sendiri, "kata si gagak. Keesokan harinya, si gagak berbohong lagi, "Seekor elang mengambil telurmu." ucapnya. Akhirnya, para burung pipit menyusun rencana untuk menangkap si pencuri telur. Mereka menaruh getah karet di sarang tempat telur-telur tersebut dierami. Keesokan harinya, mereka melihat gagak tidak bisa bergerak karena getah karet tersebut; dan ternyata si gagaklah penjahatnya. Akhirnya si gagak meminta maaf pada burung pipit, dan ia-pun berjanji untuk tidak mengulanginya lagi.

**ChatGPT: The Liar Crow**

One day, four sparrows were perched on a large tree. Above them sat a crow. “Hey, I’m lost. Can I stay with you? I’d like to be your friend,” said the crow. “Of course!” replied the four sparrows. The sparrows were very kind and trusted the crow. One day, they said to the crow, “We are sad because a snake has taken our eggs.” The crow then said, “Put your eggs in my nest, and I will guard them!” After the sparrows left, the crow ate all of their eggs. When the sparrows returned home, they were shocked to see that all their eggs were broken. “Who did this?” cried the sparrows. “Hey, sparrows, I know the snake did it. I saw it myself,” said the crow. The next day, the crow lied again, saying, “An eagle took your eggs.” Finally, the sparrows made a plan to catch the egg thief. They put rubber sap in the nest where the eggs were kept. The next morning, they found the crow unable to move because it was stuck to the sap—and they realized the crow was the real culprit. In the end, the crow apologized to the sparrows and promised never to do it again.

**Manusia**

# The Crow Who Lied

Once upon a time, four sparrows nested on a big tree. One day, a crow came and said, “Hello. I’m lost. Could I stay here with you? I can be your friend.” “Well, of course!” said the sparrows.

The sparrows were very kind to the crow. Then one day, they said, “We’re really upset. A snake took our eggs.” “Put your eggs in my nest, and I’ll take care of them!” the crow replied. But after the sparrows left their nest, the crow ate all the eggs. When the sparrows came back, they were shocked because all their eggs were broken. “Who did this?” cried the sparrows. “Sparrows, I know a snake did it. I saw it myself,” said the crow, lying. The next day, the crow ate the eggs again and said, “An eagle took your eggs.” The sparrows then came up with a plan to catch the thief. They put rubberwood sap on their nest around the eggs. The next day, they saw the crow had gotten stuck on the sap. The culprit was the crow! The crow apologized to the sparrows, and he promised not to do it again.

**SL: Nelayan dan Ikan Mas**

Ada sepasang suami istri yang sudah tua tinggal di sebuah pulau kecil. Sang kakek bekerja sebagai nelayan dan sang nenek adalah seorang ibu rumah tangga. Hari demi hari, kakek pergi ke laut untuk mencari ikan. Tapi dia sama sekali tidak mendapatkan ikan. Suatu hari, tiba-tiba jaringnya bergerak, lalu dia menariknya. Ada ikan emas kecil di dalam jaringnya. Sang kakek sangat kaget saat mendengar ikan itu berbicara kepadanya. Ikan tersebut mengatakan kepadanya bahwa ikan tersebut dapat mengabulkan keinginannya jika sang kakek membiarkannya pergi. Tapi nelayan itu tidak meminta apapun dan membiarkan ikannya pergi. Sesampainya di rumah, sang nenek marah karena kakek tidak mendapatkan ikan sehingga mereka tidak memiliki makanan sama sekali. Kemudian, kakek-pun mengatakan kepada nenek bahwa dia menemukan seekor ikan emas yang bisa mengabulkan permintaannya. Mendengar ceritanya, nenek menjadi lebih marah karena dia tidak meminta apapun. Sang nenek lalu meminta kakek untuk kembali ke laut untuk menemui ikan emas. Dia menginginkan segalanya tapi dia tidak pernah puas. Dia bahkan ingin menjadi dewi laut yang tinggal di istana dengan banyak pelayan. Laut emas tidak mengatakan apa-apa dan berenang kembali ke laut. Ketika mereka pulang, mereka tidak melihat istana dengan banyak pelayan. Mereka hanya melihat sebuah pondok tua; sang nenek hanya bisa menyesali dirinya yang serakah.

**Chatgpt: The Fisherman and the Golden Fish**

There was an elderly husband and wife who lived on a small island. The old man worked as a fisherman, and the old woman was a homemaker. Day after day, the old man went out to sea to catch fish, but he never caught anything.

One day, suddenly his net moved, and he pulled it up. Inside the net was a small goldfish. The old man was shocked when he heard the fish speak to him. The fish told him that it could grant his wishes if he would let it go. But the fisherman asked for nothing and released the fish.

When he got home, the old woman was angry because he had caught no fish and they had no food. The old man then told her that he had found a goldfish that could grant wishes. Hearing this, the old woman became even angrier because he had asked for nothing. She then told him to go back to the sea to find the goldfish.

She wanted everything, yet she was never satisfied. She even wished to become a sea goddess living in a palace with many servants.

The goldfish said nothing and swam back into the sea. When they returned home, they did not see a palace or servants. They only saw their old hut. The old woman could only regret her own greed.

**Human: The Fisherman and the Golden Fish**

There was an elderly couple living on an island. The old man caught fish for a living and his wife was a housewife.

Every day, the old man sailed to the sea to catch fish. One day, he did not catch any fish until he saw net was moving and then pulled it. There was a little golden fish caught is his net. He was surprised that the fish spoke. The little fish said that it could make his wish come true if he let it go. But then, the man did not ask for anything and let the fish go.

When he came home, his wife was angry because he did not catch any fish so they did not have anything to eat. Then, he said that he had found a golden fish that could make wishes come true. The old lady became even angrier because he had not made any wish. She asked the old man to go back to the sea and look for the golden fish. She wanted everything but she was never satisfied. She even wanted to become the sea goddess who lived in a palace with many servants. The golden fish did not say anything and swam back into the ocean.

When they came back home, they did not see a palace with servants. The only saw an old hut. The old lady was sorry that she was greedy.

**SL: Semut dan Belalang**

Di tengah hutan, hiduplah seekor semut yang sangat rajin. Setiap hari semut itu selalu bekerja mengumpulkan makanan dan menyimpannya di dalam lumbung. Teriknya matahari dan derasnya air hujam tidak mengurangi semangat Sang Semut untuk mengumpulkan makanan. Dengan bersusah payah, Sang Semut bekerja keras untuk membawa makanan kemudian dikumpulkan dan disimpan di dalam lumbung rumahnya. Pada suatu hari ketika sedang bekerja, Sang Semut bertemu dengan seekor belalang yang sedang asyik berjemur sambil bermalas-malasan. "Hai Mut, kamu sedang apa?" tanya belalang. "Aku sedang mengumpulkan makanan untuk persiapan musim dingin." Jawab semut, "Ah, buat apa kamu melakukannya sekarang? Musim dingin lama, lebih baik kita bermalasmalasan dulu." Kata belalang lagi. Sang semut tidak memedulikan belalang tetap saja bekerja mengumpulkan makanan yang dijumpainya. Demikianlah sepanjang hari Sang Semut sibuk bekerja, sementara sang belalang bermalas-malasan. Akhirnya musim dingin tiba. Sang Semut yang rajin itu duduk dengan nyaman di dalam rumahnya yang hangat. Ia menikmati makanannya yang berlimpah. Belalang termenung sedih di rumahnya karena tidak memiliki makanan sedikitpun. Saat belalang hampir mati kelaparan, Sang Semut datang dan memberinya makanan. Sejak saat itu, Sang belalang rajin bekerja mengumpulkan makanan seperti semut.

**Chatgpt: An Ant and A Grasshopper**

In the middle of the forest lived a very diligent ant. Every day, the ant worked hard gathering food and storing it in his barn. The scorching sun and heavy rain never reduced the Ant’s enthusiasm for collecting food. With great effort, he carried food back and forth, gathering and storing it in his little home. One day, while he was working, the Ant met a grasshopper who was sunbathing and lazing around. “Hey, Ant, what are you doing?” asked the grasshopper. “I’m collecting food to prepare for winter,” the ant replied. “Ah, why do that now? Winter is still far away. It’s better for us to relax,” said the grasshopper. The Ant ignored the grasshopper and continued working to gather the food he found. All day long, the Ant stayed busy, while the grasshopper kept lazing around. Finally, winter came. The hardworking Ant sat comfortably inside his warm home, enjoying his plentiful food supply. The grasshopper, on the other hand, sat sadly in his house because he had no food at all. When the grasshopper was close to starving, the Ant came and shared some food with him. From that day on, the grasshopper worked diligently to collect food just like the ant.

**Human: The Ant and the Grasshopper**

In the forest, lived a diligent ant. Every day, the ant worked hard gathering food and keeping it in his home. The hot sun and heavy rain did not stop him.

One day, when the ant was working, he met a grasshopper, relaxing under the sun.

“Hey, ant. What are you doing?” the grasshopper asked.

“I’m gathering food to prepare for winter,” the ant replied.

“Oh, why do it now? Winter is still a long way off. Let’s just relax,” said the grasshopper.

The ant ignored the grasshopper and continued working. All day the ant worked while the grasshopper slacked.

Winter eventually came. The hard-working ant sat comfortably in his warm home, enjoying plenty of food. But the grasshopper was sad because he did not have any food. When the grasshopper was starving, the ant came to him and gave him food. Since then, the grasshopper became diligent.

**SL: Rino si Badak Jawa**

Rino adalah badak jawa yang tinggal di hutan Ujung Kulon, Jawa Barat. Rino bersahabat dengan Kila Kelinci dan Tupi Tupai.Suatu hari, Kila dan Tupi melihat Rino sedang bersedih."Ada apa, Rino? Biasanya kemu selalu ceria." Sapa Kila kelinci. "Aku sedang sedih. Kata Ridho sepupuku, jumlah badak Jawa semakin sedikit. Kami, badak Jawa masih sering diincar pemburu liar yang menyelinap masuk ke hutan. Aku khawatir ditangkap pemburu." Jawab Rino."Kasihan sekali kamu, Rino," Kata Tupi."Iya, para pemburu liar itu mengincar cula badak yang katanya berharga mahal." Lanjut Rino lesu."kamu tenang saja, Rino. Kami berdua akan melindungimu dari ancaman para pemburu liar." Lanjut Tupi. Keesokan hari, Kila dan Tupi terkejut. Saat mereka hendak menemui Rino, tiba-tiba mereka melihat dua orang berwajah seram membawa senjata api di hutan. "Jangan-jangan mereka mau berburu Rino?" Kata Tupi."Iya, kita harus memberi tahu Rino agar segera lari!" Tanggap Kila.Namun terlambat, para pemburu ternyata sudah melihat Rino terlebih dulu."Itu dia! Badak jawa yang sedang kita cari. Segera siapkan senapan!" Kata seorang pemburu. Tupi dan Kila pun tersentak. "Wah, kita harus bertindak menyelamakan sahabat kita!" seru Tupi.Saat dua pemburu itu sudah bersiap membidik Rino, tiba-tiba Tupi dan Kila melompat ke masing-masing kepala kedua pemburu liar itu dan menarik rambut mereka. "Rino, cepat lari! Ada pemburu liar!" teriak Kila.Rino lalu menoleh. Ia kemudian segera lari ke arah selatan hutan. Tupi dan Kila pun kabur ke semak-semak meninggalkan kedua pemburu yang marah."Aduh, tupai dan kelinci itu bikin kacau rencana kita! Badak jawa buruan kita sudah kabur!" kata seorang pemburu. Tupi dan Kila bergegas menyusul Rino ke hutan yang lebih aman. "Berkat pertolongan kalian, aku selamat!" Rino berterima kasih."Oh, ini sudah kewajiban kami menolong sahabat yang sedang kesulitan." Kata Tupi."Ya, kami juga ingin memantu keluarga besarmu Badak jawa agar selamat dari kepunahan." timpal Kila.Akhirnya ketiga sahabat itu bermain bersama lagi.

**ChatGPT: Rino the Javanese Rhino**

Rino was a Javan rhinoceros who lived in the Ujung Kulon forest in West Java. Rino was friends with Kila the Rabbit and Tupi the Squirrel. One day, Kila and Tupi noticed that Rino looked sad. “What’s wrong, Rino? You’re usually so cheerful,” greeted Kila.

“I’m sad. My cousin Ridho told me that the number of Javan rhinos is getting smaller. We Javan rhinos are still often hunted by poachers who sneak into the forest. I’m afraid I might get caught,” Rino replied. “Oh no, that’s terrible, Rino,” said Tupi. “Yes, those poachers want rhino horns because they say they’re very valuable,” Rino continued gloomily. “Don’t worry, Rino. We’ll protect you from those poachers,” Tupi assured him. The next day, Kila and Tupi were shocked. As they were about to visit Rino, they suddenly saw two scary-looking men carrying guns in the forest. “Could they be hunting Rino?” said Tupi. “Yes! We have to warn Rino so he can run!” said Kila. But it was too late—the poachers had spotted Rino first. “There he is! The Javan rhino we’re looking for. Get the rifle ready!” said one of the poachers. Tupi and Kila panicked. “We must act fast to save our friend!” shouted Tupi. Just as the two poachers aimed their guns at Rino, Tupi and Kila jumped onto each of the poachers’ heads and pulled their hair. “Rino, run! There are poachers!” yelled Kila. Rino turned around and immediately ran toward the southern part of the forest. Tupi and Kila quickly escaped into the bushes, leaving the angry poachers behind. “That squirrel and rabbit ruined our plan! Our target—the Javan rhino—got away!” complained one of the poachers. Tupi and Kila hurried to catch up with Rino in a safer part of the forest. “Thanks to your help, I’m safe!” Rino said gratefully. “Oh, it’s our duty to help a friend in trouble,” said Tupi. “Yes, and we also want to help protect your Javan rhino family from extinction,” added Kila. At last, the three friends were able to play together again.

**Human: Rino the Javan Rhinoceros**

Rino the Javan Rhinoceros lived in the forest in Ujung Kulon, West Java. Rino had two best friends, Kila the rabbit and Tupi the squirrel. One day, Kila saw that Rino was sad.

“What’s wrong Rino? You’re usually cheerful,” asked Killa.

“I’m upset. My cousin Ridho told me that rhinos are being hunted by poachers. I’m worried that they’ll get me,” Rino answered.

“Poor Rino,” Tupi said.

“Yeah, the poachers want our precious horns,” Rino replied.

“Don’t worry, Rino. We’ll protect you from the hunters,” Tupi assured.

The next day, Kila and Tupi were shocked. On the way to meet Rino, they saw two scary humans with guns.

“Are they going after Rino?” Tupi was worried.

“I think so. Let’s tell Rino to get away!” Kila responded.

But it was too late. The poachers already saw Rino.

“That’s the Javan rhino we’re looking for. Get the rifle ready!” Said one of the poachers.

Tupi and Kila were startled. “We have to save our best friend!” Tupi thought.

When the poachers were aiming at Rino, Tupi and Killa jumped on the poachers’ heads and pulled their hair.

“Rino, run! Poachers!” yelled Kila.

Rino turned his head and immediately ran south. Tupi and Kila jumped off and went into the bushes.

The squirrel and the rabbit ruined our plan! The rhino escaped!” said a hunter.

Tupi and Killa rushed to follow Rino to a safer part of the forest.

“Thanks for saving me!” Rino was grateful.

“Oh, that’s what friends are for,” Tupi replied.

“Yeah, we want to help you and the Javan rhinos survive,” Kila added.

After that, the three best friends were happy playing together.

**SL: Kiki, Kelinci yang Tak Mau Kalah**

Pada suatu hari Kiki mengikuti suatu lomba bersama lima peserta lainnya, yaitu Leo si singa, Harry si kuda nil, Tubi si beruang, Zeko si zebra, Moni si monyet, dan Kiki sendiri. Ada tiga juri yang menilai lomba tersebut, yaitu Baba si babon, Kaka si kakaktua, dan Dobi si anjing. "Para peserta, sebentar lagi lomba pertama akan dimulai" kata Dobi. Kiki bersiap-siap untuk berlomba, dan ia sudah merancang kecurangan dalam pikirannya. Memang demikian, Kiki, sering sekali bertindak tidak sportif. Lomba pertama adalah membawa kelereng ke garis akhir dengan menggunakan sendok. "3..2..1.. mulai!" seru Baba. Maka lomba pun dimulai. Kiki mulai bertindak curang. Diam-diam ia majukan ibu jarinya pada tangkai sendok untuk menahan kelereng agar tidak terjatuh. Banyaknya peserta yang ikut lomba menyebabkan juri tidak dapat mengawasi dengan cermat satu-persatu. Kiki pun keluar sebagai juara pertama di lomba tersebut. Kiki merasa senang sekaligus lega. Kecurangannya tidak diketahui oleh para juri. Ia merasa pintar dan cerdik. Perlombaan dilanjutkan dengan lomba kedua. Lomba memindahkan air ke gelas yang diberi lubang kecil. Dan... "3..2..1..mulai!"Kali ini Kaka yang memberi aba-aba. Lagi-lagi juri tidak mengawasi dengan baik. Kiki berhasil menukar gelas, dengan gelas lain yang tidak berlubang. Ia pun cepat berlari dengan gelas berisi air, sehingga berhasil memenuhi gelas di garis akhir. Dalam hal berlari, Kiki memang gesit. Lagi-lagi, Kiki keluar sebagai juara pertama pada lomba ini. Perlombaan terus dilanjutkan. Sebelum lomba ketiga dimulai, Kaka mengumumkan: "Mohon perhatian. Kami, para juri mengajak seluruh peserta bersikap sportif. Peserta yang ketahuan berbuat curang akan didiskualifikasi oleh juri." demikian katanya. Kiki ketakutan mendengar pengumuman itu. Lomba ketiga adalah bermain bola. "3..2..1..priiiit!!" tiupan peluit Dobi memberi aba-aba. Kiki memang dikenal jago dalam bermain bola. Namun, keahliannya tidak diikuti sikap yang baik Ia sombong, dan ketika lomba berjalan ia bermain dengan kasar. Akibatnya ada peserta lain yang cedera. Dobi pun mengeluarkan kartu merah, Kiki pun didiskualifikasi. Kiki sedih, ia berusaha meminta pada juri untuk memaafkan kesalahannya. Tetapi ternyata, setelah menganalisa ulang, juri pun curiga bahwa pada lomba-lomba sebelumnya Kiki juga melakukan kecurangan. "Bagaimana kamu tahu kalau aku berbuat curang?" tanya Kiki ketika kecurigaan tersebut diungkapkan oleh Baba. "Aku curiga, mengapa hanya kamu yang berhasil sampai di garis akhir tanpa menjatuhkan kelereng." ujar Baba. "Begitupun di lomba kedua. Hanya sekali berlari, kamu berhasil mengisi gelas di garis akhir hingga penuh. Seharusnya dengan gelas berlubang, kamu perlu beberapa kali bolak-balik untuk memenuhi gelas di garis akhir." tambah Kaka. Kiki pun terdiam. "Ya sudah, aku terima penilaian ini. Aku harus sportif, karena ini adalah konsekuensiku." ujar Kiki pelan. Ketiga juri tersenyum mendengar perkataan Kiki Semua lomba telah selesai. Baba akan memberikan pengumuman pemenang. "Setelah semua lomba selesai dilaksanakan, juri sudah berdiskusi. Kami memutuskan bahwa pemenangnya adalah......HARRY." kata Baba kepada seluruh peserta. Harry senang bukan kepalang. Namun di pinggir arena, ada Kiki yang bersedih dan menyesal atas perbuatannya. Seharusnya ia bisa menjadi juara. Moni datang menghampiri Kiki. "Tidak apa, Kiki. Masih banyak waktu untuk mengikuti lomba lagi di lain kali. Makanya, jika kamu ikut lomba, kamu harus sportif, dan harus menerima jika kalah." hibur Moni. "Iya, Moni. Aku pun belajar dari kejadian hari ini. Memang tidak seharusnya aku bersikap curang. Aku sendiri yang akhirnya rugi dan menyesal." ujarnya. Kiki lalu mengajak Moni untuk memberi selamat kepada Harry. Ia ingin memulai sikap sportif. Menghargai temannya sebagai pemenang lomba.

**ChatGPT: Kiki, A Selfish Rabbit**

One day, Kiki joined a competition with five other participants: Leo the Lion, Harry the Hippo, Tubi the Bear, Zeko the Zebra, Moni the Monkey, and Kiki himself. There were three judges: Baba the Baboon, Kaka the Cockatoo, and Dobi the Dog. “Participants, the first event will begin shortly,” said Dobi. Kiki prepared himself for the competition, already planning to cheat. Indeed, Kiki often behaved unsportingly. The first event was carrying a marble to the finish line using a spoon. “3…2…1… go!” shouted Baba. The competition began. Kiki immediately started cheating. Secretly, he pushed his thumb up against the spoon’s handle to keep the marble from falling. Because there were so many participants, the judges couldn’t watch each one closely. Kiki ended up winning first place in the event. He felt both happy and relieved. The judges had not noticed his cheating. He felt clever and sneaky. The competition continued with the second event: transferring water into a cup that had a small hole. “3…2…1… go!” This time Kaka gave the signal. Once again, the judges weren’t watching closely. Kiki managed to switch his leaking cup with another cup that had no hole. He then ran quickly with the cup full of water, easily filling the cup at the finish line. Kiki was indeed fast. Once again, he won first place. The competition moved on. Before the third event began, Kaka announced, “Attention, please. We, the judges, urge all participants to be sportsmanlike. Anyone caught cheating will be disqualified.” Kiki became frightened hearing the announcement. The third event was a ball game. “3…2…1… *priiit!*” Dobi blew the whistle. Kiki was known to be good at playing ball. However, his skill was not matched by good behavior. He was arrogant, and during the game he played roughly, causing another participant to get injured. Dobi gave him a red card, and Kiki was disqualified. Kiki was sad and tried to beg the judges for forgiveness. But after reviewing the situation, the judges became suspicious that Kiki had also cheated in the previous events. “How did you know I cheated?” Kiki asked when Baba revealed their suspicion.
“I was suspicious because you were the only one who reached the finish line without dropping the marble,” said Baba. “And in the second event, you filled the finish-line cup in just one trip. With a cup that had a hole, you should have needed several trips back and forth,” added Kaka.

Kiki fell silent. “All right, I accept your judgment. I must be sportsmanlike—this is the consequence of my actions,” Kiki said softly. The three judges smiled at Kiki’s admission. All the events were finished. Baba announced the winner. “After reviewing all the competitions, the judges have decided that the winner is… HARRY,” said Baba. Harry was overjoyed. But at the edge of the field, Kiki felt sad and regretful about what he had done. He should have been able to win. Moni came over to him. “It’s okay, Kiki. There will be more competitions in the future. That’s why, if you compete, you need to be sportsmanlike and accept losing,” comforted Moni. “Yes, Moni. I learned something today. I really shouldn’t have cheated. In the end, I was the one who lost and regretted it,” Kiki replied. Kiki then invited Moni to congratulate Harry. He wanted to begin practicing good sportsmanship—respecting his friend as the rightful winner.

**Human: Kiki the Cheating Rabbit**

One day, Kiki the rabbit joined a competition with five other contestants, Leo the lion, Harry the hippopotamus, Tubi the bear, Zeko the zebra, and Moni the monkey. There were three judges, Baba the baboon, Kaka the cockatoo, and Dobi the dog.

“Contestants, we’re going to start the first match,” Dobi announced.

Kiki was getting ready and he was thinking of cheating. He often cheats. The first match was taking a marble using a spoon to the finish line.

“3… 2… 1… go!” Baba shouted and the race began.

Kiki cheated by using his thumb to hold the spoon and kept the marble from falling. The judges did not notice because there were so many contestants. Kiki won the first match. He was glad that the judges did not know that he cheated. He thought he was clever.

The second match was moving water into a glass that had a little hole.

“3… 2… 1… go!” Kaka started the match.

The judges did not notice that Kiki cheated again. He switched his glass with one that did not have any holes. He quickly ran with a glass full of water and filled the glass at the finish line. He was fast so he won again.

Before the next match, Kaka announced, “Attention. We, the judges, ask you to show sportsmanship. Cheating contestants will be disqualified.” Hearing this, Kiki was scared.

The third match was football. “3… 2… 1…, fweeet!” Dobi blew his whistle to start the match. Kiki was good at playing football, but he was arrogant. He played dirty and another player was hurt. Dobi gave him the red card and he was out of the game. He was upset and asked the judges to forgive him. But the judges thought that Kiki had cheated in the other matches.

“How do you know that I cheated?” Kiki asked.

“I wondered why were you the only one to get to the finish line without dropping the marble,” Baba said. “Also in the second match, you only ran once. With a hole in the glass, you are supposed to run back and forth a few times to fill the glass at the finish line.” Baba added.

“Alright, I understand. I have to be a good sport and I made mistakes,” Kiki said softly. The three judges smiled. The competition was over.

Baba then announced the winner, “We’ve done all the matches and we’ve decided that the winner of this competition is… HARRY!” Harry was very excited. But, on the side of the field, Kiki was sad and regretful. He could have won.

Moni came over and said, “It’s okay, Kiki. You can still join the competition next time. But you have to be a good sport, and don’t be afraid of losing.”

“Yes, Moni. I know that now. I shouldn’t have cheated. I’m sorry.” Kiki admitted.

Kiki and Moni went to congratulate Harry. From then on, Kiki wanted to have a good sportsmanship.

**SL: Candi Songgoriti**

Kuil Songgoriti atau Candi Supo adalah satu-satunya candi Mpu Sindok, raja pertama Kerajaan Medang, di Batu. Candi ini mulai dibangun oleh Mpu Sindok yang ingin membangun sebuah tempat peristirahatan untuk para tamu kerajaan di gunung dimana terdapat mata air. Menteri besar kerajaan, Mpu Supo, menjadi pemimpin pembangunan kuil ini. Sampai sekarang, ada mata air segar dan segar di sekitar candi. Dulu, orang menggunakan mata air untuk membersihkan keris mereka (belati tradisional Jawa). Banyak orang percaya bahwa mata air yang dulunya sejuk dan segar sudah menjadi panas. Mata air panas ini bertahan lama sampai hari ini dan menjadi daya tarik di kuil Songgoriti

**ChatGPT: Songgoriti Temple**

The Songgoriti Temple, also known as Candi Supo, is the only temple built by Mpu Sindok—the first king of the Medang Kingdom—in Batu. The temple was begun by Mpu Sindok, who wanted to create a resting place for royal guests on a mountain where a natural spring flowed. The kingdom’s chief minister, Mpu Supo, was appointed to lead the construction of the temple.

To this day, there is a fresh and clear spring around the temple. In the past, people used the spring water to clean their keris (traditional Javanese daggers). Many people believe that the once cool and refreshing spring has now become warm. This hot spring has remained until today and has become one of the main attractions at Songgoriti Temple.

**Human: Songgoriti Temple**

The Songgoriti Temple or Supo Temple is the only temple of Mpu Sindok, the first king of the Medang Kingdom, in Batu, East Java. The temple was built by Mpu Sindok who wanted to make a resting place in the mountains with a water spring for the guests. The prime minister, Mpu Supo, led the construction of the temple.

Near the temple, there is a refreshing spring. In the past, people used the water to wash their *keris* (a traditional blade from Java). Many people believed that its water used to be cool and refreshing, but then it became hot. The hot water spring still exists until today, and has become an attraction in Songgoriti Temple.

**SL: Candi Singosari**

Kerajaan Singhasari dibangun pada tahun 1222 oleh Ken Arok yang menikahi seorang putri cantik dari Jenggala, Ken Dedes. Kerajaan Singhasari sukses dan terkenal dengan daerah pertaniannya di sepanjang Sungai Brantas dan perdagangan maritim di Laut Jawa. Candi Singosari juga dikenal sebagai "Kuil Ken Dedes." Candi ini terletak di tempat Raja Kertanegara (1268-1292), atau dikenal sebagai Bhirawa atau Shiva yang ketat, dimakamkan. Di bagian barat candi Singosari, ada dua patung raksasa dengan panjang sekitar 3,7 meter. Patung-patung ini disebut Arca Dwarpala yang diyakini sebagai penjaga Kerajaan Singhasari yang besar dan indah.

**Chatgpt; Singosari Temple**

The Singhasari Kingdom was founded in 1222 by Ken Arok, who married a beautiful princess from Jenggala, Ken Dedes.

The Singhasari Kingdom prospered and became well known for its agricultural lands along the Brantas River and its maritime trade in the Java Sea.

The Singosari Temple is also known as the “Temple of Ken Dedes.”

It is located at the site where King Kertanegara (1268–1292), also known as Bhirawa or the strict form of Shiva, was buried.

On the western side of the Singosari Temple stand two giant statues about 3.7 meters tall.

These statues, called the Dwarpala Arca, are believed to be the guardians of the great and magnificent Singhasari Kingdom.

**Human: Singosari Temple**

The Singhasari or Singosari Kingdom was built in 1222 by Ken Arok who married Ken Dedes, a beautiful princess from Jenggala. The Kingdom was prosperous and was famous for its farming along the Brantas River and its marine trading in the Java Sea. The Singosari Temple was also known as the Ken Dedes Temple. The temple is located in the burial site of King Kertanegara (1268-1292) also known as Bhirawa or the rigorous Shiva. In the west part of the temple, there are two giant statues that are 3.7 meters long. They are called Arca Dwarpala and are believed to be the guardians of the vast and beautiful Singosari Kingdom.

**SL: Roro Jonggrang**

Roro Jonggrang adalah seorang putri dari Kerajaan Prambanan. Raja Prambanan, ayah Roro Jonggrang gugur dalam pertarungan melawan Bandung Bondowoso dari Kerajaan Pengging. Akibatnya, Bandung Bondowoso menguasai Kerajaan Prambanan. Bandung Bondowoso yang tamak menginginkan Roro Jonggrang sebagai permaisurinya. Roro Jonggrang yang tidak mau diperistri oleh Bandung Bondowoso pun mengajukan syarat-syarat. "Aku bersedia menjadi permaisurimu, Bandung Bondowoso. Tetapi, ada syarat yang harus kau penuhi. Jika berhasil, aku akan menikah denganmu. Namun, jika gagal izinkan aku pergi." Kata Roro Jonggrang. "Apapun yang kau minta akan aku penuhi, Roro Jonggrang. Jika aku gagal memenuhinya, aku akan mengembalikan kerajaan ini untukmu." Sahut Bandung Bondowoso angkuh. "Aku minta kau membangun seribu candi untukku. Semua harus selesai sebelum matahari terbit esok. "ahut Roro Jonggrang. "Baiklah, aku pasti berhasil memenuhi syarat yang kau buat." Jawab Bandung Bondowoso. Bandung Bondowoso meminta bantuan pasukan jin untuk membangun seribu candi. Dalam sekejap, bangunan candi mulai tampak. Roro Jonggrang panik, dia mengadu pada Bi Sumi, dayang kepercayaannya. Bi Sumi mempunyai ide untuk menggagalkan pekerjaan Bandung Bondowoso. Dia segera memerintahkan para dayang untuk menumbuk lesung dan membakar jerami. Suara lesung bertalu-talu dan semburat api yang memerah di langit membuat suasana seperti pagi hari. Ayamayam jantan berkokok bersahut-sahutan. Mendengar kokok ayam jantan, pasukan jin terkejut. "Hari sudah pagi, kami harus pergi." Teriak pasukan jin sambil meninggalkan Bandung Bondowoso dan candi-candi yang telah mereka bangun. Roro Jonggrang mendatangi Bandung Bondowoso. Roro Jonggrang segera menghitung candi-candi yang sudah selesai.

**Chatgpt: Roro Jonggrang**

Roro Jonggrang was a princess of the Prambanan Kingdom. The King of Prambanan, her father, was defeated in battle by Bandung Bondowoso of the Pengging Kingdom. As a result, Bandung Bondowoso took control of Prambanan. Greedy and ambitious, he wanted Roro Jonggrang to become his queen. Refusing to marry Bandung Bondowoso, Roro Jonggrang set certain conditions. “I will agree to become your queen, Bandung Bondowoso. But you must fulfill one requirement. If you succeed, I will marry you. But if you fail, you must let me go,” said Roro Jonggrang. “Whatever you ask, I will fulfill it, Roro Jonggrang. And if I fail, I will return this kingdom to you,” replied Bandung Bondowoso arrogantly. “I want you to build a thousand temples for me. All must be completed before sunrise tomorrow,” said Roro Jonggrang. “Very well, I will surely succeed in meeting your requirement,” answered Bandung Bondowoso.

Bandung Bondowoso summoned his army of spirits to help build the thousand temples. In an instant, the structures began to rise. Roro Jonggrang panicked and went to Bi Sumi, her trusted handmaiden. Bi Sumi came up with a plan to sabotage Bandung Bondowoso’s work. She immediately ordered the other handmaidens to pound rice mortars and burn straw. The pounding sounds echoed loudly, and the red glow of the burning straw lit up the sky, making it appear as if morning had arrived. Roosters began to crow one after another. Hearing the roosters crow, the spirits were startled. “It’s already morning! We must go!” they shouted, fleeing and leaving Bandung Bondowoso and the half-finished temples behind. Roro Jonggrang approached Bandung Bondowoso and began counting the temples that had been completed.

**Human: Roro Jonggrang**

Roro Jonggrang was a princess from the Prambanan Kingdom. The King, Roro Jonggrang’s father, died in a battle against Bandung Bondowoso from the Pengging Kingdom. Bandung Bondowoso then ruled the Prambanan Kingdom.

Bandung Bondowoso was greedy and wanted Roro Jonggrang to be his queen. He did not want to marry him, so she set a condition.

“I will be your queen, Bandung Bondowoso, only if you succeed in a task. However, if you fail, let me to leave.” Said Roro Jonggrang.

“I will do anything you ask, Roro Jonggrang. If I fail, I shall give this kingdom back to you,” Bandung Bondowoso replied arrogantly.

“Build a thousand temples for me. They must be completed before sunrise tomorrow.” Roro Jonggrang asked.

"Of course. I will not fail,” Bandung Bondowoso said.

Bandung Bondowoso asked for help from an army of djinns to build the temples. In an instant, the temples appeared. Roro Jonggrang was frightened and talked to Bi Sumi, her trusted maid. Bi Sumi had an idea to stop Bandung Bondowoso’s work. She immediately told the other maids to pound big wooden mortars and to burn straw.

The pounding sound and the reddish sky from the fire made it look like that it was already morning, and the roosters crowed. Hearing the roosters, the djinn army was surprised.

“It’s morning, we have to go!” The army shouted as they left Bandung Bondowoso and the temples they had built. Roro Jonggrang came to Bandung Bondowoso. She immediately counted the temples.

“There are only 999 temples. You are one temple short,” she said.

Bandung Bondowoso did not believe it. He immediately counted the temples and there were indeed only 999 temples.

He was furious. “I will not lose, Roro Jonggrang. I will build a thousand temples as you wish.”

“But you do not have a thousand temples, Bandung Bondowoso. You have to keep your word,” Roro Jonggrang replied.

“Then, I will turn you into the thousandth temple!”

With his magical powers, Bandung Bondowoso turned Roro Jonggrang into a stone statue. That statue became the thousandth temple. Today, the temples still stand tall in the Prambanan area.

**SL: Ki Ageng Gribig**

Ki Ageng Gribig, ulama besar yang waktu mudanya bernama WasibagnoTimur, adalah putra Kiai Ageng Gribig (Kyai Ageng Tinom putra Browijoyo Mojopahit) dari Ngibig (menantu Sunan Giri) Saat Wasibagno berumur belasan tahun, ia sudah ditinggal wafat oleh ayah-ibundanya. Ia tidak mau mengikuti tradisi kerajaan, melainkan memilih jalan hidup bertapa. Usai mendapatkan wangsit dari kakeknya, yaitu Sunan Giri, berangkatklah Wasibagno ke arah barat. Sesampainya di hutan Merbabu di lereng Gunung Merapi, ia memutuskan mulai bertapa (semedi) dibawah bendungan Kali Bogowondo. Di situlah ia bertapa bertahun-tahun lamanya. Mendengar kejadian itu, Sunan Kalijaga dari Kadilangu Demak segera menemui Sunan Tembayat, yang juga disebut Sunan Pandanaran, untuk memberitahukan bahwa di bawah Kali Bogowondo ada seorang pertapa yang masih punya hubungan darahdengan Sunan Tembayat. Sunan Kalijaga meminta agar Sunan Tembayat maumenemui dan mengajarkan ilmu kebendaan, serta yang menyangkut ilmu serengat (syari'ah), hakikat dan ma'rifat. Setelah jelas apa yang dikehendaki Sunan Kalijaga, berangkatlah Sunan Tembayat menemui Wasigbagno. Di tempat pertapaan itulah terjadi perdebatanantara Wasigbagno dengan Sunan Tembayat mengenai ilmu yng dimaksud Sunan Kalijaga. Wasigbagno merasa kalah, dan ia pun bersujud serta menyatakan diri untuk masuk Islam dan meminta segera diberi pelajaran tatacara bersembahyang. Setelah mendapat pelajaran dari Sunan tembayat, Wasigbagno pun segera berangkat ke arah timur Kali Bogowondo. Ia berganti nama menajdi Ki AgengGribig, nama ayahnya. Di sebuah hutan jati, ia memutuskan mulai babat alas dan membangun masjid serta mendirikan padukuhan. Bertahun-tahun lamanya Ki Ageng Gribig babat alas sendiri. Kemudian, ia memperdalam ilmu yang didapatnya dari Sunan Tembayat. Apa yang diinginkan akhirnya terwujud, Padukuhan yang dibangun mulai didatangi orang. Konon, suatu saat menjelang salat dluhur, Ki Ageng Gribig membunyikan tabuh. Tanpa disangka, suara itu terdengar sampai ke Mataram yang saat itusedang punya hajat wisudan (pelantikan) Sultan Agung. Sultan Agung, tertarikdan memerintahkan mencari asal suara untuk diajak ke Mataram. Kemudian, padukuhan yang dibangun Ki Ageng Gribig diberi hadiah sebagai tanahperdikan. Sebagai gantinya, Ki Ageng Gribig diwajibkanikut hadir setiap peringatan hari kelahiran Sultan Agungdi Mataram. Selain itu Ki Ageng Gribig juga diberi hadiah istri, yang tidak lain Raden Ayu Emas, adik Sultan Agung sendiri.

**Human: The Wise Sage**

Ki Ageng Gribig, a great Islamic scholar whose childhood name was Wasibagno Timur, was the son of Kiai Ageng Gribig (Kyai Ageng Tinom, the son of Browijoyo of Majapahit) from Ngibig, and also the son-in-law of Sunan Giri. When Wasibagno was in his early teens, both of his parents passed away. He chose not to follow the traditions of the royal family and instead devoted himself to a life of asceticism.

After receiving a divine instruction (wangsit) from his grandfather, Sunan Giri, Wasibagno set out westward. When he reached the Merbabu forest on the slopes of Mount Merapi, he decided to begin meditating (tapa/semadi) beneath the Bogowondo River dam. There he meditated for many years.

When Sunan Kalijaga of Kadilangu, Demak, heard about this, he immediately went to inform Sunan Tembayat—also known as Sunan Pandanaran—that beneath the Bogowondo River lived a hermit who was actually related to him. Sunan Kalijaga requested that Sunan Tembayat meet the hermit and teach him about material knowledge as well as the sciences of **shari‘ah**, **haqiqah**, and **ma‘rifah**.

Understanding Sunan Kalijaga’s intention, Sunan Tembayat set out to meet Wasibagno. At the hermitage, a debate ensued between the two regarding the knowledge that Sunan Kalijaga had referred to. Feeling defeated, Wasibagno prostrated himself, declared his conversion to Islam, and asked to be taught how to perform the ritual prayers.

After learning from Sunan Tembayat, Wasibagno immediately traveled east of the Bogowondo River and changed his name to **Ki Ageng Gribig**, adopting his father’s name. In a teak forest, he began clearing the wilderness (babat alas), building a mosque, and establishing a settlement. For years, Ki Ageng Gribig cleared the land on his own while deepening the knowledge he had received from Sunan Tembayat.

Eventually, his efforts bore fruit, and people began to come to the settlement he founded. Legend says that one day, shortly before the noon prayer, Ki Ageng Gribig struck a ceremonial drum. Unexpectedly, its sound carried all the way to Mataram, where Sultan Agung’s inauguration ceremony was taking place. Intrigued, Sultan Agung ordered his attendants to find the source of the sound and bring the person responsible to Mataram.

As recognition, the settlement built by Ki Ageng Gribig was granted the status of *tanah perdikan*—a tax-exempt land. In return, Ki Ageng Gribig was required to attend the annual celebration of Sultan Agung’s birthday in Mataram. Additionally, he was given a wife as a royal gift: none other than Raden Ayu Emas, Sultan Agung’s own sister.

**ChatGPT: Ki Ageng Gribig**

Ki Ageng Gribig was a great Islamic scholar. When he was young, he was called Wasibagno Timur. He was the son of Kiai Ageng Gribig (also known as Kyai Ageng Tinom, son of Browijoyo Mojopahit) from Ngibig (son-in-law of Sunan Giri). When Wasibagno was a teenager, his parents passed away. He did not want to follow the royal tradition, but chose to live an ascetic life and meditate. After receiving a spiritual message from his grandfather, Sunan Giri, Wasibagno travelled to the west. He arrived at Merbabu forest on the slopes of Mount Merapi. He decided to meditate under the Bogowondo River dam and he did it for years.

Hearing about Wasibagno, Sunan Kalijaga from Kadilangu, Demak, told Sunan Tembayat (also called Sunan Pandanaran) about the Wasibagno who was a relative of Sunan Tembayat. Sunan Kalijaga asked Sunan Tembayat to see him and teach him about Islam. Sunan Tembayat met with Wasigbagno. After a long argument, Wasigbagno followed Islam and he asked to learn about praying.

After learning from Sunan Tembayat, Wasigbagno went to the east of Bogowondo River and changed his name to Ki Ageng Gribig, his father’s name. In a forest, he built a mosque and a small village for years. People came to his village and learned Islam.

Before the Dzuhur prayer, he beat a large drum to call people to pray. The sound was heard all the way to Mataram and reached Sultan Agung. The Sultan was interested and ordered his troops to find the source of the sound. After the Sultan met with Ki Ageng Gribig, the village was freed from any tax. In return, Ki Ageng Gribig had to attend every celebration in Mataram. Ki Ageng Gribig was also married to Raden Ayu Emas, Sultan Agung’s sister.

**SL: Wendit**

Asal usul Wendit ini terjadi dikarenakan adanya pergeseran Gunung Widodaren yang merupakan salah satu gunung dalam gugusan Pegunungan Bromo.Pergeseran gunung Widodaren membuat masyarakat suku Tengger kesulitan untukmengambil air suci yang berada di mata air Widodaren karena curamnya lereng. Karena kesulitan tersebut, para pendito bersemedi kepada Sang Hyang WidhiWasa di sekitar gunung Widodaren agar mendapatkan petunjuk dimanakah percikanmata air Widodaren mengarah. Wahyu pun turun, para pendito mendapatkan wahyubahwa percikan air Widodaren mengarah ke Malang. Karena luasnya Malang, pendito tersebut mengambil bukit Mangliawan sebagai tempat bersemedi. Namadesa Mangliawan sendiri berasal dari cerita pewayangan Ramayana dengan tokohHanoman. Uniknya, cerita ini bukan hanya sekedar isapan jempol belaka. Sebab di Taman Wisata Air Wendit ini memang terdapat beberapa spesies kera (atau monyet) yang mendiaminya. Monyet-monyet ini dipercaya sebagai punggawa kerajaan dariTengger untuk menjaga mata air tersebut. Dan hingga kini monyet-monyet tersebut tetap lestari. Mata air yang keluar dan mengalir setelah pendito tadi bersemedi dinamakanWendito atau Wendit sampai kini. Lokasi mata air yang kini menjadi pemandianterbesar di antara wisata lainnya di Malang Raya ini dipercaya sebagai lokasi peristirahatan Raja Majapahit yakni Hayam Wuruk. Beberapa kepercayaan setempat meyakini bahwa air yang berasal dari mata air Wendit sama sucinya danberkhasiat magis seperti mata air Widodaren di Bromo dan mata air Pulau Sempu di Malang Selatan. Adapun khasiat yang diyakini adalah dapat memberikan kesembuhan dalam penyakit, enteng jodoh, mudah rezekinya dan awet muda.

**ChatGPT:** **The Origin of Wendit**

The origin of Wendit is believed to have begun with the shifting of Mount Widodaren, one of the mountains in the Bromo range. The movement of Mount Widodaren made it difficult for the Tengger people to access the sacred water found at the Widodaren spring because of the steep slopes. Due to this hardship, the priests (*pendito*) meditated and prayed to Sang Hyang Widhi Wasa around Mount Widodaren, seeking guidance on where the scattered droplets of the Widodaren spring might flow.

The divine revelation came: the priests received a message that the droplets of the Widodaren water were flowing toward Malang. Because Malang was vast, the priests chose Mangliawan Hill as their place of meditation. The name *Mangliawan* itself is said to come from the Ramayana epic, particularly from the character Hanoman. Uniquely, this story is not mere folklore—because in Wendit Water Park today, several species of monkeys still inhabit the area. These monkeys are believed to be guardians sent from the Tengger kingdom to protect the sacred spring, and they continue to thrive to this day.

The spring that emerged and flowed after the priests meditated there was named *Wendito* or *Wendit*, a name still used today. The location of the spring—now the largest public bathing site among tourist attractions in Greater Malang—is believed to have been a resting place of the Majapahit king, Hayam Wuruk. Local beliefs hold that the water from the Wendit spring is as sacred and as magically potent as the Widodaren spring in Bromo and the Sempu Island spring in South Malang. Its believed virtues include healing illnesses, easing one’s path to marriage, bringing good fortune, and promoting youthfulness.

**Human: Wendit**

A long time ago, Mount Widodaren in Bromo shifted. Hence, it is difficult for the people of Tengger to take holy water from the Widodaren spring because the slope became very steep. So, the Hindu monks meditated around Mount Widodaren, asking their God, Sang Hyang Widhi Wasa, to show them where the spring water flowed to. They were shown that the water was flowing to Malang. Because Malang was a large area, they meditated again in Mangliawan.

The name Mangliawan came from Hanoman the white monkey in the Ramayana story. Several species of apes and monkeys lived there, and they still do until today. They are believed to be the guards of the spring.

Spring water suddenly came out and flowed in Mangliawan when the monks were meditating. The spring was then called Wendito or Wendit. The place is now the largest bathing pool in Malang. It is believed to be the resting place of Hayam Wuruk, the King of Majapahit. Another belief is that the water from Wendit Spring is holy and magical like the water from Widodaren Spring in Bromo and Sempu Island Spring in South Malang. It is said that the water has the power to cure illness, help people find a partner, and make people wealthy.
